# Supplementary material for: Penalized factorial regression as a flexible and computationally attractive reaction norm model for prediction in the presence of GxE
Source: Springer Nature journal article supplement (doi:10.1007/s00122-025-04865-4), 2025-03-28

# **Supplementary Material: Penalized factorial regression as a flexible and computationally attractive reaction norm model for prediction in the presence of GxE**

## **Appendix A: Methodology**

We have considered the following factorial regression

$$Y_{i,j} = \mu + g_i + e_j + \sum_{t=1}^{n_c} v_{i,j}^{(t)} \beta_{i,t} + \epsilon_{i,j}, \quad (\text{S1})$$

We rewrite the factorial regression model (S1) in following matrix form:

$$\begin{aligned}
\mathbf{Y} &= \begin{pmatrix} Y_{1,1} \\ Y_{1,2} \\ \vdots \\ Y_{n_g, n_e-1} \\ Y_{n_g, n_e} \end{pmatrix} = \begin{pmatrix} \mu \\ \mu \\ \vdots \\ \mu \\ \mu \end{pmatrix} + \begin{pmatrix} g_1 \\ g_1 \\ \vdots \\ g_{n_g} \\ g_{n_g} \end{pmatrix} + \begin{pmatrix} e_1 \\ e_2 \\ \vdots \\ e_{n_e-1} \\ e_{n_e} \end{pmatrix} \\
&+ \begin{pmatrix} V_{1,1}\beta_1 \\ V_{1,2}\beta_1 \\ \vdots \\ V_{n_g, n_e-1}\beta_{n_g} \\ V_{n_g, n_e}\beta_{n_g} \end{pmatrix} + \begin{pmatrix} \epsilon_{1,1} \\ \epsilon_{1,2} \\ \vdots \\ \epsilon_{n_g, n_e-1} \\ \epsilon_{n_g, n_e} \end{pmatrix} \\
&= \begin{pmatrix} 1 \\ 1 \\ \vdots \\ 1 \\ 1 \end{pmatrix} \mu + \begin{pmatrix} 1 & 0 & \dots & 0 \\ 1 & 0 & \dots & 0 \\ \vdots & & & \\ 0 & 0 & \dots & 1 \\ 0 & 0 & \dots & 1 \end{pmatrix} \times \begin{pmatrix} g_1 \\ g_2 \\ \vdots \\ g_{n_g-1} \\ g_{n_g} \end{pmatrix} \\
&+ \begin{pmatrix} 1 & 0 & \dots & 0 & 0 \\ 0 & 1 & \dots & 0 & 0 \\ \vdots & & & & \\ 0 & 0 & \dots & 1 & 0 \\ 0 & 0 & \dots & 0 & 1 \end{pmatrix} \times \begin{pmatrix} e_1 \\ e_2 \\ \vdots \\ e_{n_e-1} \\ e_{n_e} \end{pmatrix} \\
&+ \begin{pmatrix} V_{1,1} & 0 & \dots & 0 \\ V_{1,2} & 0 & \dots & 0 \\ \vdots & & & \\ 0 & 0 & \dots & V_{n_g, n_e-1} \\ 0 & 0 & \dots & V_{n_g, n_e} \end{pmatrix} \times \begin{pmatrix} \beta_1 \\ \beta_2 \\ \vdots \\ \beta_{n_g-1} \\ \beta_{n_g} \end{pmatrix} + \begin{pmatrix} \epsilon_{1,1} \\ \epsilon_{1,2} \\ \vdots \\ \epsilon_{n_g, n_e-1} \\ \epsilon_{n_g, n_e} \end{pmatrix} \\
&= \mu \mathbf{1} + \mathbf{A}_1 g + \mathbf{A}_2 e + \mathbf{V} \beta + \epsilon \\
&= \mu \mathbf{1} + [\mathbf{A}_1, \mathbf{A}_2, \mathbf{V}] (g', e', \beta')' + \epsilon \\
&= \mu \mathbf{1} + \mathbf{X} \gamma + \epsilon,
\end{aligned}$$

where we set  $e_1$  and  $g_1$  to zero, in order to guarantee the "identifiability" of the model. Here,  $\mathbf{Y} \in \mathbb{R}^{n_{ge} \times 1}$  is a vector which contains all  $Y_{i,j}$  yields,  $\mathbf{X} =$

$[\mathbf{A}_1, \mathbf{A}_2, \mathbf{V}] \in \mathbb{R}^{n_{ge} \times (n_g - 1 + n_e - 1 + n_g n_e)}$  is a joined design matrix which contains the set of dummy variables corresponding to the genotypic and environmental main effects, and the set of environmental covariates per genotypes,  $\mathbf{1} \in \mathbb{R}^{n_{ge} \times 1}$  is a column vector of ones, and  $\epsilon \in \mathbb{R}^{n_{ge} \times 1}$  is a column vector which contains error terms  $\epsilon_{i,j}$ . Here,  $\gamma = (g', e', \beta')' \in \mathbb{R}^{(n_g - 1 + n_e - 1 + n_g n_e) \times 1}$  is a column vector which contains all coefficients of interests, i.e., genotypic main effects  $g = (g_2, \dots, g_{n_g})' \in \mathbb{R}^{(n_g - 1) \times 1}$ , environmental main effects  $e = (e_2, \dots, e_{n_e})' \in \mathbb{R}^{(n_e - 1) \times 1}$  and sensitivities  $\beta = (\beta'_1, \dots, \beta'_{n_g})' \in \mathbb{R}^{n_g n_e \times 1}$ , where each  $\beta_i \in \mathbb{R}^{n_e \times 1}$  are the genotype sensitivities, defined earlier.

Formally, we write the Elastic Net penalized solution of the coefficients as

$$\{\hat{\mu}, \hat{\gamma}\} = \arg \min_{\mu, \gamma} \frac{1}{2} \|\mathbf{Y} - \mu \mathbf{1} - \mathbf{X}\gamma\|_2^2 + \lambda \left( \alpha \|\beta\|_1 + \frac{1 - \alpha}{2} \|\beta\|_2^2 \right)$$

where  $\|\cdot\|_2$  and  $\|\cdot\|_1$  are  $\ell_2$  and  $\ell_1$  norms, respectively. Here,  $\lambda > 0$  is a penalty (or tuning) parameter and indicates the intensity of the employed penalization. This parameter requires clever selection, which is commonly done using a cross-validation approach. Finally,  $0 \leq \alpha \leq 1$  is the mixing parameter:  $\alpha = 1$  leads to Lasso,  $\alpha = 0$  leads to Ridge and  $0 < \alpha < 1$  leads to Elastic Net penalization, respectively. As mentioned earlier, for the sake of simplicity, in this article we select equal weights for the Elastic Net penalty term, i.e.,  $\alpha = 0.5$ .

## Appendix B: Performance Evaluation

To assess the performance of a given prediction in both training and test environments, we define the following accuracy measure.

Pearson correlation averaged over environments

$$\text{APCOR}_{\text{Env}}(\hat{\mathbf{Y}}, \mathbf{Y}) = \frac{1}{p} \sum_j \rho(\hat{Y}_{\cdot,j}; Y_{\cdot,j}).$$

## Appendix C: Supplementary Figures

**Fig. S1** *Factreg* Lasso regression coefficients for the maize data.

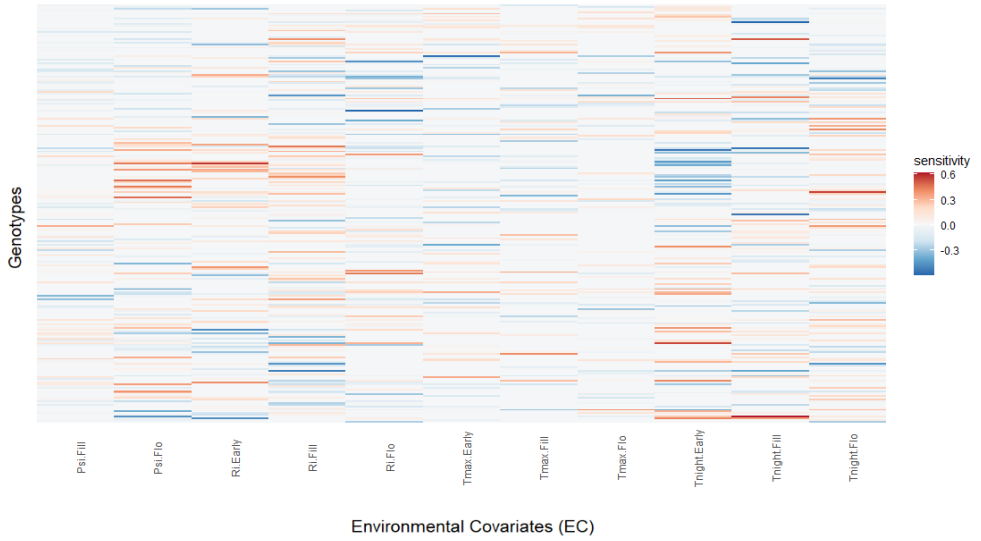

Supplement: MOESM1 [file 122_2025_4865_MOESM1_ESM.pdf]
